# Supplementary material
Source: MDPI journal article supplement (https://www.mdpi.com/2410-3896/8/2/34)
Supplement: s1 [file s1]

Archive with 1 entries (1 files):
- condensedmatter-2193370-supplementary.pdf
